# Supplementary material for: Losartan and isoproterenol promote alterations in the local renin-angiotensin system of rat salivary glands
Source: PubMed Central journal article supplement (PMC6530859; doi:10.1371/journal.pone.0217030), 2019-05-22
Supplement: pone.0217030.s001.pdf [file pone.0217030.s001.pdf]

**S1 Fig. Salivary volume measured as the differences between tubes before and after saliva collection.**

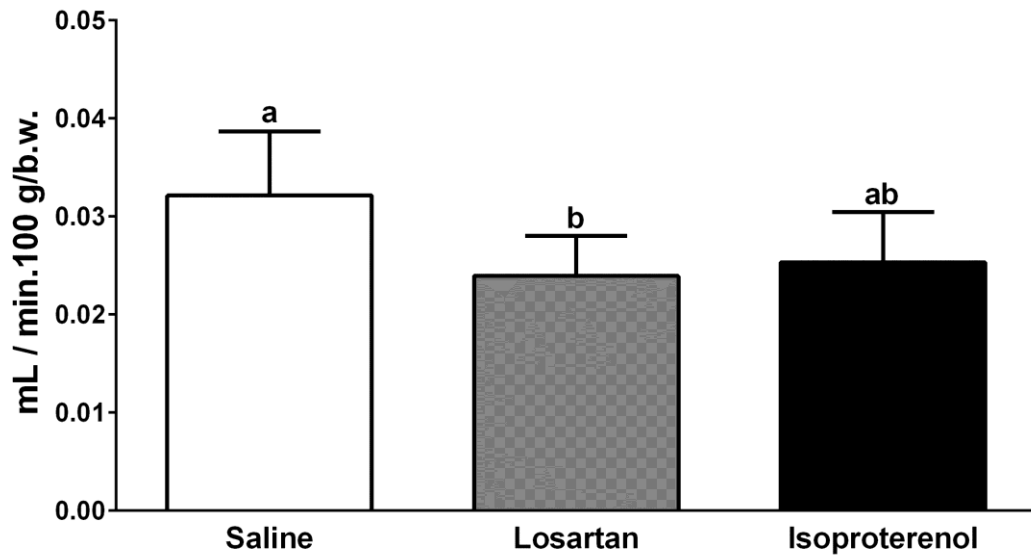

The salivary flow rate was normalized and expressed as mL/min.100g/b.w, considering saliva density 1 mg/mL. Data are means  $\pm$  standard deviation. One-way ANOVA/Tukey's multiple comparison tests were performed. Differences were considered statistically significant when  $p < 0.05$ . Different letters indicate a statistically significant difference between groups and, when such differences were noticed between two groups but not in a third one as compared to both, the latter is represented as ab.
