# Supplementary material for: Losartan and isoproterenol promote alterations in the local renin-angiotensin system of rat salivary glands
Source: PubMed Central journal article supplement (PMC6530859; doi:10.1371/journal.pone.0217030), 2019-05-22
Supplement: pone.0217030.s002.pdf [file pone.0217030.s002.pdf]

**S1 Table. Rat weight (grams) after 7-day injection of saline, losartan and isoproterenol.** \* indicate rats in isoproterenol group that died before the experiment was finished.

| <b>SALINE</b> | <b>LOSARTAN</b> | <b>ISOPROTERENOL</b> |
|---------------|-----------------|----------------------|
| 312           | 332             | 335                  |
| 319           | 303             | 307                  |
| 248           | 300             | 323                  |
| 324           | 357             | 304                  |
| 336           | 324             | 330                  |
| 315           | 341             | *                    |
| 352           | 355             | *                    |
