# Supplementary material for: Losartan and isoproterenol promote alterations in the local renin-angiotensin system of rat salivary glands
Source: PubMed Central journal article supplement (PMC6530859; doi:10.1371/journal.pone.0217030), 2019-05-22
Supplement: pone.0217030.s004.pdf [file pone.0217030.s004.pdf]

**S3 Table. Rat weight (grams) after 7-day injection of saline, losartan and isoproterenol.**

| <b>SALINE</b> | <b>LOSARTAN</b> | <b>ISOPROTERENOL</b> |
|---------------|-----------------|----------------------|
| 310           | 279             | 280                  |
| 321           | 294             | 308                  |
| 297           | 306             | 270                  |
| 294           | 256             | 265                  |
| 290           | 285             | 293                  |
|               | 251             | 282                  |
|               | 326             | 274                  |
|               |                 | *                    |

Rats used for salivary flow measurements. \* indicate rat in isoproterenol group that died before the experiment was finished.
